# Supplementary material for: Exploring Safety Culture in the ICU of a Large Acute Teaching Hospital through Triangulating Different Data Sources
Source: MDPI journal article supplement (doi:10.3390/healthcare11233095), 2023-12-04
Supplement: s1 [file s1]

# ICU Adverse Event Trigger Tool Worksheet

(Information pertains only to the patient's stay in the ICU)

Hospital MemberID#

□□□□□□□□□□

Patient's Reference #

□□□□

Patient's Age

□□□ yrs

Patient's Gender

□ F □ M

## Triggers:

Which triggers appeared in the patient's record?  
(Mark all that apply)

- ☐ Positive blood culture.....
- ☐ Abrupt drop in Hg > 4gms.....
- ☐ *C. difficile* positive .....
- ☐ PTT > 100 .....
- ☐ INR > 6 .....
- ☐ Glucose < 50 .....
- ☐ Rising BUN and/or Serum Creatinine to 2x baseline.....
- ☐ Radiologic tests for emboli or clot.....
- ☐ Benadryl .....
- ☐ Vitamin K .....
- ☐ Flumazenil (Romazicon) .....
- ☐ Naloxone (Narcan) .....
- ☐ Antidiarrheals.....
- ☐ Antiemetics.....
- ☐ Sodium Polystyrene (Kayexalate) .....
- ☐ Code .....
- ☐ Pneumonia onset in unit.....
- ☐ Readmission to ICU.....
- ☐ New onset dialysis.....
- ☐ In-unit procedures.....
- ☐ Intubation/Reintubation.....
- ☐ Abrupt medication stop .....
- ☐ Oversedation/Lethargy/Hypotension.....
- ☐ Other.....

## Adverse Events:

\*If an adverse event occurred, mark the highest harm category:

| No Harm | E | F | G | H | I |
|---------|---|---|---|---|---|
| Y       | Y | Y | Y | Y | Y |
| Y       | Y | Y | Y | Y | Y |
| Y       | Y | Y | Y | Y | Y |
| Y       | Y | Y | Y | Y | Y |
| Y       | Y | Y | Y | Y | Y |
| Y       | Y | Y | Y | Y | Y |
| Y       | Y | Y | Y | Y | Y |
| Y       | Y | Y | Y | Y | Y |
| Y       | Y | Y | Y | Y | Y |
| Y       | Y | Y | Y | Y | Y |
| Y       | Y | Y | Y | Y | Y |
| Y       | Y | Y | Y | Y | Y |
| Y       | Y | Y | Y | Y | Y |
| Y       | Y | Y | Y | Y | Y |
| Y       | Y | Y | Y | Y | Y |
| Y       | Y | Y | Y | Y | Y |
| Y       | Y | Y | Y | Y | Y |
| Y       | Y | Y | Y | Y | Y |
| Y       | Y | Y | Y | Y | Y |

ICU Length of Stay YYY days

Total Number of Distinct Adverse Events Y

Fill out the following information below, for each DISTINCT adverse event with a harm category of E through I:

|               | Harm Category*<br>(E/F/G/H/I) | Medication Related<br>(Y/N) | Type of Medication**<br>(0 to 7) | "E" coded in UB92***<br>(Y/N) |
|---------------|-------------------------------|-----------------------------|----------------------------------|-------------------------------|
| Event #1..... | Y                             | Y                           | Y                                | Y                             |
| Event #2..... | Y                             | Y                           | Y                                | Y                             |
| Event #3..... | Y                             | Y                           | Y                                | Y                             |
| Event #4..... | Y                             | Y                           | Y                                | Y                             |
| Event #5..... | Y                             | Y                           | Y                                | Y                             |
| Event #6..... | Y                             | Y                           | Y                                | Y                             |
| Event #7..... | Y                             | Y                           | Y                                | Y                             |

**\*Harm Categories**

Category E: Contributed to temporary harm to the patient and required intervention

Category F: Contributed to temporary harm to the patient and required initial/prolonged hospitalization

Category G: Contributed to permanent patient harm

Category H: Required intervention to sustain life

Category I: Contributed to the patient's death

**\*\*Medication Code**

0—Not applicable

1—Antibiotics

2—Anticoagulants and Antiplatelets

3—Antipsychotics

4—Electrolytes

5—Insulin 6—

Narcotics 7—

Sedatives

**\*\*\*"E" Code in UB92 Form**

Was the adverse event documented as an "E" code in the ICD9 section of the UB92 form?

Yes—only pertains to documentation of the following "E" codes: Accidental poisoning (E850-E869);

Therapeutic use (E930-E949); Suicide attempt (E950-952); Assault (E961-E962); Undetermined (E980-E982)

# Hospital Survey on Patient Safety (Version 2.0)

## Instructions

This survey asks for your opinions about patient safety issues, medical error, and event reporting in your hospital and will take about 10-15 minutes to complete. If a question does not apply to you or your hospital or you don't know the answer, please select "Does Not Apply or Don't Know."

- *"**Patient safety**" is defined as the avoidance and prevention of patient injuries or adverse events resulting from the processes of healthcare delivery.*
- *A "**patient safety event**" is defined as any type of healthcare-related error, mistake, or incident, regardless of whether or not it results in patient harm.*

## Your Staff Position

### 1. What is your position in this hospital?

Select ONE answer.

#### Nursing

- ☐ 1 Advanced Practice Nurse (ANP, CNS, CNM, CNF)
- ☐ 3 Health Care Assistant
- ☐ 4 Registered Nurse (RN)

#### Medical

- ☐ 6 Intern/ Senior House Officer
- ☐ 7 Registrar / Consultant

#### Other Clinical Position

- ☐ 10 Health and Social Care Professional

#### Supervisor, Manager, Clinical Leader, Senior Leader

- ☐ 15 Supervisor, Manager, Department Manager, Clinical Leader, Administrator, Director
- ☐ 16 Senior Leader, Executive, C-Suite

#### Support

- ☐ 17 Facilities
- ☐ 18 Food Services
- ☐ 19 Housekeeping, Environmental Services
- ☐ 20 Information Technology, Health Information Services, Clinical Informatics
- ☐ 21 Security
- ☐ 22 Transporter
- ☐ 23 Unit Clerk, Secretary, Receptionist, Office Staff

#### Other

- ☐ 24 Other, please specify:

## Your Unit/Work Area

2. Think of your “unit” as the work area, department, or clinical area of the hospital where you spend most of your work time. What is your primary unit or work area in this hospital?

Select ONE answer.

### Multiple Units, No specific unit

- ☐ 1 Many different hospital units, No specific unit

### Medical/Surgical Units

- ☐ 2 Combined Medical/Surgical Unit  
☐ 3 Medical Unit (Non-Surgical)  
☐ 4 Surgical Unit

### Patient Care Units

- ☐ 5 Cardiology  
☐ 6 Emergency Department, Observation, Short Stay  
☐ 7 Gastroenterology  
☐ 8 ICU (all adult types)  
☐ 9 Labor & Delivery, Obstetrics & Gynecology  
☐ 10 Oncology, Hematology  
☐ 11 Pediatrics (including NICU, PICU)  
☐ 12 Psychiatry, Behavioral Health  
☐ 13 Pulmonology  
☐ 14 Rehabilitation, Physical Medicine  
☐ 15 Telemetry

### Surgical Services

- ☐ 16 Anesthesiology  
☐ 17 Endoscopy, Colonoscopy  
☐ 18 Pre Op, Operating Room/Suite, PACU/Post Op, Peri Op

### Clinical Services

- ☐ 19 Pathology, Lab  
☐ 20 Pharmacy  
☐ 21 Radiology, Imaging  
☐ 22 Respiratory Therapy  
☐ 23 Social Services, Case Management, Discharge Planning

### Administration/Management

- ☐ 24 Administration, Management  
☐ 25 Financial Services, Billing  
☐ 26 Human Resources, Training  
☐ 27 Information Technology, Health Information Management, Clinical Informatics  
☐ 28 Quality, Risk Management, Patient Safety

### Support Services

- ☐ 29 Admitting/Registration  
☐ 30 Food Services, Dietary  
☐ 31 Housekeeping, Environmental Services, Facilities  
☐ 32 Security Services  
☐ 33 Transport

### Other

- ☐ 34 Other, please specify:

## SECTION A: Your Unit/Work Area

How much do you agree or disagree with the following statements about your unit/work area?

| Think about your unit/work area:                                                                                 | Strongly<br>Disagree<br>▼  | Disagree<br>▼              | Neither<br>Agree nor<br>Disagree<br>▼ | Agree<br>▼                 | Strongly<br>Agree<br>▼     | Does Not<br>Apply or<br>Don't<br>Know<br>▼ |
|------------------------------------------------------------------------------------------------------------------|----------------------------|----------------------------|---------------------------------------|----------------------------|----------------------------|--------------------------------------------|
| 1. In this unit, we work together as an effective team.....                                                      | <input type="checkbox"/> 1 | <input type="checkbox"/> 2 | <input type="checkbox"/> 3            | <input type="checkbox"/> 4 | <input type="checkbox"/> 5 | <input type="checkbox"/> 9                 |
| 2. In this unit, we have enough staff to handle the workload .....                                               | <input type="checkbox"/> 1 | <input type="checkbox"/> 2 | <input type="checkbox"/> 3            | <input type="checkbox"/> 4 | <input type="checkbox"/> 5 | <input type="checkbox"/> 9                 |
| 3. Staff in this unit work longer hours than is best for patient care .....                                      | <input type="checkbox"/> 1 | <input type="checkbox"/> 2 | <input type="checkbox"/> 3            | <input type="checkbox"/> 4 | <input type="checkbox"/> 5 | <input type="checkbox"/> 9                 |
| 4. This unit regularly reviews work processes to determine if changes are needed to improve patient safety ..... | <input type="checkbox"/> 1 | <input type="checkbox"/> 2 | <input type="checkbox"/> 3            | <input type="checkbox"/> 4 | <input type="checkbox"/> 5 | <input type="checkbox"/> 9                 |
| 5. This unit relies too much on temporary, float, or PRN staff .....                                             | <input type="checkbox"/> 1 | <input type="checkbox"/> 2 | <input type="checkbox"/> 3            | <input type="checkbox"/> 4 | <input type="checkbox"/> 5 | <input type="checkbox"/> 9                 |
| 6. In this unit, staff feel like their mistakes are held against them .....                                      | <input type="checkbox"/> 1 | <input type="checkbox"/> 2 | <input type="checkbox"/> 3            | <input type="checkbox"/> 4 | <input type="checkbox"/> 5 | <input type="checkbox"/> 9                 |
| 7. When an event is reported in this unit, it feels like the person is being written up, not the problem.....    | <input type="checkbox"/> 1 | <input type="checkbox"/> 2 | <input type="checkbox"/> 3            | <input type="checkbox"/> 4 | <input type="checkbox"/> 5 | <input type="checkbox"/> 9                 |
| 8. During busy times, staff in this unit help each other .....                                                   | <input type="checkbox"/> 1 | <input type="checkbox"/> 2 | <input type="checkbox"/> 3            | <input type="checkbox"/> 4 | <input type="checkbox"/> 5 | <input type="checkbox"/> 9                 |
| 9. There is a problem with disrespectful behavior by those working in this unit .....                            | <input type="checkbox"/> 1 | <input type="checkbox"/> 2 | <input type="checkbox"/> 3            | <input type="checkbox"/> 4 | <input type="checkbox"/> 5 | <input type="checkbox"/> 9                 |
| 10. When staff make errors, this unit focuses on learning rather than blaming individuals.....                   | <input type="checkbox"/> 1 | <input type="checkbox"/> 2 | <input type="checkbox"/> 3            | <input type="checkbox"/> 4 | <input type="checkbox"/> 5 | <input type="checkbox"/> 9                 |
| 11. The work pace in this unit is so rushed that it negatively affects patient safety .....                      | <input type="checkbox"/> 1 | <input type="checkbox"/> 2 | <input type="checkbox"/> 3            | <input type="checkbox"/> 4 | <input type="checkbox"/> 5 | <input type="checkbox"/> 9                 |
| 12. In this unit, changes to improve patient safety are evaluated to see how well they worked .....              | <input type="checkbox"/> 1 | <input type="checkbox"/> 2 | <input type="checkbox"/> 3            | <input type="checkbox"/> 4 | <input type="checkbox"/> 5 | <input type="checkbox"/> 9                 |
| 13. In this unit, there is a lack of support for staff involved in patient safety errors .....                   | <input type="checkbox"/> 1 | <input type="checkbox"/> 2 | <input type="checkbox"/> 3            | <input type="checkbox"/> 4 | <input type="checkbox"/> 5 | <input type="checkbox"/> 9                 |
| 14. This unit lets the same patient safety problems keep happening .....                                         | <input type="checkbox"/> 1 | <input type="checkbox"/> 2 | <input type="checkbox"/> 3            | <input type="checkbox"/> 4 | <input type="checkbox"/> 5 | <input type="checkbox"/> 9                 |

## SECTION B: Your Supervisor, Manager, or Clinical Leader

How much do you agree or disagree with the following statements about your immediate supervisor, manager, or clinical leader?

|                                                                                                                                        | Strongly<br>Disagree<br>▼             | Disagree<br>▼                         | Neither<br>Agree nor<br>Disagree<br>▼ | Agree<br>▼                            | Strongly<br>Agree<br>▼                | Does Not<br>Apply or<br>Don't<br>Know<br>▼ |
|----------------------------------------------------------------------------------------------------------------------------------------|---------------------------------------|---------------------------------------|---------------------------------------|---------------------------------------|---------------------------------------|--------------------------------------------|
| 1. My supervisor, manager, or clinical leader seriously considers staff suggestions for improving patient safety .....                 | <input type="checkbox"/> <sub>1</sub> | <input type="checkbox"/> <sub>2</sub> | <input type="checkbox"/> <sub>3</sub> | <input type="checkbox"/> <sub>4</sub> | <input type="checkbox"/> <sub>5</sub> | <input type="checkbox"/> <sub>9</sub>      |
| 2. My supervisor, manager, or clinical leader wants us to work faster during busy times, even if it means taking shortcuts .....       | <input type="checkbox"/> <sub>1</sub> | <input type="checkbox"/> <sub>2</sub> | <input type="checkbox"/> <sub>3</sub> | <input type="checkbox"/> <sub>4</sub> | <input type="checkbox"/> <sub>5</sub> | <input type="checkbox"/> <sub>9</sub>      |
| 3. My supervisor, manager, or clinical leader takes action to address patient safety concerns that are brought to their attention .... | <input type="checkbox"/> <sub>1</sub> | <input type="checkbox"/> <sub>2</sub> | <input type="checkbox"/> <sub>3</sub> | <input type="checkbox"/> <sub>4</sub> | <input type="checkbox"/> <sub>5</sub> | <input type="checkbox"/> <sub>9</sub>      |

## SECTION C: Communication

How often do the following things happen in your unit/work area?

| Think about your unit/work area:                                                                                    | Never<br>▼                            | Rarely<br>▼                           | Some-<br>times<br>▼                   | Most of<br>the time<br>▼              | Always<br>▼                           | Does Not<br>Apply or<br>Don't<br>Know<br>▼ |
|---------------------------------------------------------------------------------------------------------------------|---------------------------------------|---------------------------------------|---------------------------------------|---------------------------------------|---------------------------------------|--------------------------------------------|
| 1. We are informed about errors that happen in this unit .....                                                      | <input type="checkbox"/> <sub>1</sub> | <input type="checkbox"/> <sub>2</sub> | <input type="checkbox"/> <sub>3</sub> | <input type="checkbox"/> <sub>4</sub> | <input type="checkbox"/> <sub>5</sub> | <input type="checkbox"/> <sub>9</sub>      |
| 2. When errors happen in this unit, we discuss ways to prevent them from happening again ..                         | <input type="checkbox"/> <sub>1</sub> | <input type="checkbox"/> <sub>2</sub> | <input type="checkbox"/> <sub>3</sub> | <input type="checkbox"/> <sub>4</sub> | <input type="checkbox"/> <sub>5</sub> | <input type="checkbox"/> <sub>9</sub>      |
| 3. In this unit, we are informed about changes that are made based on event reports .....                           | <input type="checkbox"/> <sub>1</sub> | <input type="checkbox"/> <sub>2</sub> | <input type="checkbox"/> <sub>3</sub> | <input type="checkbox"/> <sub>4</sub> | <input type="checkbox"/> <sub>5</sub> | <input type="checkbox"/> <sub>9</sub>      |
| 4. In this unit, staff speak up if they see something that may negatively affect patient care .....                 | <input type="checkbox"/> <sub>1</sub> | <input type="checkbox"/> <sub>2</sub> | <input type="checkbox"/> <sub>3</sub> | <input type="checkbox"/> <sub>4</sub> | <input type="checkbox"/> <sub>5</sub> | <input type="checkbox"/> <sub>9</sub>      |
| 5. When staff in this unit see someone with more authority doing something unsafe for patients, they speak up ..... | <input type="checkbox"/> <sub>1</sub> | <input type="checkbox"/> <sub>2</sub> | <input type="checkbox"/> <sub>3</sub> | <input type="checkbox"/> <sub>4</sub> | <input type="checkbox"/> <sub>5</sub> | <input type="checkbox"/> <sub>9</sub>      |
| 6. When staff in this unit speak up, those with more authority are open to their patient safety concerns .....      | <input type="checkbox"/> <sub>1</sub> | <input type="checkbox"/> <sub>2</sub> | <input type="checkbox"/> <sub>3</sub> | <input type="checkbox"/> <sub>4</sub> | <input type="checkbox"/> <sub>5</sub> | <input type="checkbox"/> <sub>9</sub>      |
| 7. In this unit, staff are afraid to ask questions when something does not seem right .....                         | <input type="checkbox"/> <sub>1</sub> | <input type="checkbox"/> <sub>2</sub> | <input type="checkbox"/> <sub>3</sub> | <input type="checkbox"/> <sub>4</sub> | <input type="checkbox"/> <sub>5</sub> | <input type="checkbox"/> <sub>9</sub>      |

## SECTION D: Reporting Patient Safety Events

| Think about your unit/work area:                                                                                                | Never<br>▼                            | Rarely<br>▼                           | Some-<br>times<br>▼                   | Most of<br>the time<br>▼              | Always<br>▼                           | Does Not<br>Apply or<br>Don't<br>Know<br>▼ |
|---------------------------------------------------------------------------------------------------------------------------------|---------------------------------------|---------------------------------------|---------------------------------------|---------------------------------------|---------------------------------------|--------------------------------------------|
| 1. When a mistake is <u>caught and corrected</u> before <u>reaching the patient</u> , how often is this reported? .....         | <input type="checkbox"/> <sub>1</sub> | <input type="checkbox"/> <sub>2</sub> | <input type="checkbox"/> <sub>3</sub> | <input type="checkbox"/> <sub>4</sub> | <input type="checkbox"/> <sub>5</sub> | <input type="checkbox"/> <sub>9</sub>      |
| 2. When a mistake reaches the patient and <u>could have harmed the patient, but did not</u> , how often is this reported? ..... | <input type="checkbox"/> <sub>1</sub> | <input type="checkbox"/> <sub>2</sub> | <input type="checkbox"/> <sub>3</sub> | <input type="checkbox"/> <sub>4</sub> | <input type="checkbox"/> <sub>5</sub> | <input type="checkbox"/> <sub>9</sub>      |
| 3. <u>In the past 12 months</u> , how many patient safety events have <u>you</u> reported?                                      |                                       |                                       |                                       |                                       |                                       |                                            |
| <input type="checkbox"/> a. None                                                                                                |                                       |                                       |                                       |                                       |                                       |                                            |
| <input type="checkbox"/> b. 1 to 2                                                                                              |                                       |                                       |                                       |                                       |                                       |                                            |
| <input type="checkbox"/> c. 3 to 5                                                                                              |                                       |                                       |                                       |                                       |                                       |                                            |
| <input type="checkbox"/> d. 6 to 10                                                                                             |                                       |                                       |                                       |                                       |                                       |                                            |
| <input type="checkbox"/> e. 11 or more                                                                                          |                                       |                                       |                                       |                                       |                                       |                                            |

## SECTION E: Patient Safety Rating

1. How would you rate your unit/work area on patient safety?

|                                       |                                       |                                       |                                       |                                       |
|---------------------------------------|---------------------------------------|---------------------------------------|---------------------------------------|---------------------------------------|
| Poor                                  | Fair                                  | Good                                  | Very Good                             | Excellent                             |
| ▼                                     | ▼                                     | ▼                                     | ▼                                     | ▼                                     |
| <input type="checkbox"/> <sub>1</sub> | <input type="checkbox"/> <sub>2</sub> | <input type="checkbox"/> <sub>3</sub> | <input type="checkbox"/> <sub>4</sub> | <input type="checkbox"/> <sub>5</sub> |

## SECTION F: Your Hospital

How much do you agree or disagree with the following statements about your hospital?

| Think about your hospital:                                                                         | Strongly<br>Disagree<br>▼             | Disagree<br>▼                         | Neither<br>Agree nor<br>Disagree<br>▼ | Agree<br>▼                            | Strongly<br>Agree<br>▼                | Does Not<br>Apply or<br>Don't<br>Know<br>▼ |
|----------------------------------------------------------------------------------------------------|---------------------------------------|---------------------------------------|---------------------------------------|---------------------------------------|---------------------------------------|--------------------------------------------|
| 1. The actions of hospital management show that patient safety is a top priority .....             | <input type="checkbox"/> <sub>1</sub> | <input type="checkbox"/> <sub>2</sub> | <input type="checkbox"/> <sub>3</sub> | <input type="checkbox"/> <sub>4</sub> | <input type="checkbox"/> <sub>5</sub> | <input type="checkbox"/> <sub>9</sub>      |
| 2. Hospital management provides adequate resources to improve patient safety .....                 | <input type="checkbox"/> <sub>1</sub> | <input type="checkbox"/> <sub>2</sub> | <input type="checkbox"/> <sub>3</sub> | <input type="checkbox"/> <sub>4</sub> | <input type="checkbox"/> <sub>5</sub> | <input type="checkbox"/> <sub>9</sub>      |
| 3. Hospital management seems interested in patient safety only after an adverse event happens..... | <input type="checkbox"/> <sub>1</sub> | <input type="checkbox"/> <sub>2</sub> | <input type="checkbox"/> <sub>3</sub> | <input type="checkbox"/> <sub>4</sub> | <input type="checkbox"/> <sub>5</sub> | <input type="checkbox"/> <sub>9</sub>      |
| 4. When transferring patients from one unit to another, important information is often left out.   | <input type="checkbox"/> <sub>1</sub> | <input type="checkbox"/> <sub>2</sub> | <input type="checkbox"/> <sub>3</sub> | <input type="checkbox"/> <sub>4</sub> | <input type="checkbox"/> <sub>5</sub> | <input type="checkbox"/> <sub>9</sub>      |

- |                                                                                                  |                                       |                                       |                                       |                                       |                                       |  |                                       |
|--------------------------------------------------------------------------------------------------|---------------------------------------|---------------------------------------|---------------------------------------|---------------------------------------|---------------------------------------|--|---------------------------------------|
| 5. During shift changes, important patient care information is often left out .....              | <input type="checkbox"/> <sub>1</sub> | <input type="checkbox"/> <sub>2</sub> | <input type="checkbox"/> <sub>3</sub> | <input type="checkbox"/> <sub>4</sub> | <input type="checkbox"/> <sub>5</sub> |  | <input type="checkbox"/> <sub>9</sub> |
| 6. During shift changes, there is adequate time to exchange all key patient care information ... | <input type="checkbox"/> <sub>1</sub> | <input type="checkbox"/> <sub>2</sub> | <input type="checkbox"/> <sub>3</sub> | <input type="checkbox"/> <sub>4</sub> | <input type="checkbox"/> <sub>5</sub> |  | <input type="checkbox"/> <sub>9</sub> |



## Background Questions

1. How long have you worked in this hospital?

- ☐a. Less than 1 year
- ☐b. 1 to 5 years
- ☐c. 6 to 10 years
- ☐d. 11 or more years

2. In this hospital, how long have you worked in your current unit/work area?

- ☐a. Less than 1 year
- ☐b. 1 to 5 years
- ☐c. 6 to 10 years
- ☐d. 11 or more years

3. Typically, how many hours per week do you work in this hospital?

- ☐a. Less than 30 hours per week
- ☐b. 30 to 40 hours per week
- ☐c. More than 40 hours per week

4. In your staff position, do you typically have direct interaction or contact with patients?

- ☐a. YES, I typically have direct interaction or contact with patients
- ☐b. NO, I typically do NOT have direct interaction or contact with patients

## Your Comments

Please feel free to provide any comments about how things are done or could be done in your hospital that might affect patient safety.

Thank you for completing this survey
