# Supplementary material for: Exploring Safety Culture in the ICU of a Large Acute Teaching Hospital through Triangulating Different Data Sources
Source: MDPI journal article supplement (doi:10.3390/healthcare11233095), 2023-12-04
Supplement: s1 [file s1]

## Checklist for Reporting Of Survey Studies (CROSS)

| Section/topic             | Item | Item description                                                                                                                                                                                                                                                                                                                                                  | Reported on page #                 |
|---------------------------|------|-------------------------------------------------------------------------------------------------------------------------------------------------------------------------------------------------------------------------------------------------------------------------------------------------------------------------------------------------------------------|------------------------------------|
| <b>Title and abstract</b> |      |                                                                                                                                                                                                                                                                                                                                                                   |                                    |
| Title and abstract        | 1a   | State the word “survey” along with a commonly used term in title or abstract to introduce the study’s design.                                                                                                                                                                                                                                                     | Abstract page 1                    |
|                           | 1b   | Provide an informative summary in the abstract, covering background, objectives, methods, findings/results, interpretation/discussion, and conclusions.                                                                                                                                                                                                           | Abstract page 1                    |
| <b>Introduction</b>       |      |                                                                                                                                                                                                                                                                                                                                                                   |                                    |
| Background                | 2    | Provide a background about the rationale of study, what has been previously done, and why this survey is needed.                                                                                                                                                                                                                                                  | Intro page 1-3                     |
| Purpose/aim               | 3    | Identify specific purposes, aims, goals, or objectives of the study.                                                                                                                                                                                                                                                                                              | Intro page 1-3                     |
| <b>Methods</b>            |      |                                                                                                                                                                                                                                                                                                                                                                   |                                    |
| Study design              | 4    | Specify the study design in the methods section with a commonly used term (e.g., cross-sectional or longitudinal).                                                                                                                                                                                                                                                | Methods page 4                     |
|                           | 5a   | Describe the questionnaire (e.g., number of sections, number of questions, number and names of instruments used).                                                                                                                                                                                                                                                 | Methods page 4-5                   |
|                           | 5b   | Describe all questionnaire instruments that were used in the survey to measure particular concepts. Report target population, reported validity and reliability information, scoring/classification procedure, and reference links (if any).                                                                                                                      | Intro page 1-3<br>Methods page 4-6 |
|                           | 5c   | Provide information on pretesting of the questionnaire, if performed (in the article or in an online supplement). Report the method of pretesting, number of times questionnaire was pre-tested, number and demographics of participants used for pretesting, and the level of similarity of demographics between pre-testing participants and sample population. | N/A                                |
| Data collection methods   | 5d   | Questionnaire if possible, should be fully provided (in the article, or as appendices or as an online supplement).                                                                                                                                                                                                                                                | Appendix page 20                   |
| Sample characteristics    | 6a   | Describe the study population (i.e., background, locations, eligibility criteria for participant inclusion in survey, exclusion criteria).                                                                                                                                                                                                                        | Methods page 4                     |
|                           | 6b   | Describe the sampling techniques used (e.g., single stage or multistage sampling, simple random sampling, stratified sampling, cluster sampling, convenience sampling). Specify the locations of sample participants whenever clustered sampling was applied.                                                                                                     | Methods page 4-5                   |
|                           | 6c   | Provide information on sample size, along with details of sample size calculation.                                                                                                                                                                                                                                                                                | Methods page 4                     |

|                        |                                                                                                 |                                                                                                                                                                                                                                                                                       |                  |
|------------------------|-------------------------------------------------------------------------------------------------|---------------------------------------------------------------------------------------------------------------------------------------------------------------------------------------------------------------------------------------------------------------------------------------|------------------|
| Survey administration  | 6d                                                                                              | Describe how representative the sample is of the study population (or target population if possible), particularly for population-based surveys.                                                                                                                                      | Methods page 4   |
|                        | 7a                                                                                              | Provide information on modes of questionnaire administration, including the type and number of contacts, the location where the survey was conducted (e.g., outpatient room or by use of online tools, such as SurveyMonkey).                                                         | Methods page 5   |
|                        | 7b                                                                                              | Provide information of survey's time frame, such as periods of recruitment, exposure, and follow-up days.                                                                                                                                                                             | Methods page 4-6 |
|                        | Provide information on the entry process:                                                       |                                                                                                                                                                                                                                                                                       |                  |
|                        | 7c                                                                                              | →For non-web-based surveys, provide approaches to minimize human error in data entry.                                                                                                                                                                                                 | Methods page 4-6 |
| Study preparation      | →For web-based surveys, provide approaches to prevent "multiple participation" of participants. |                                                                                                                                                                                                                                                                                       |                  |
|                        | 8                                                                                               | Describe any preparation process before conducting the survey (e.g., interviewers' training process, advertising the survey).                                                                                                                                                         | N/A              |
| Ethical considerations | 9a                                                                                              | Provide information on ethical approval for the survey if obtained, including informed consent, institutional review board [IRB] approval, Helsinki declaration, and good clinical practice [GCP] declaration (as appropriate).                                                       | Methods page 5   |
|                        | 9b                                                                                              | Provide information about survey anonymity and confidentiality and describe what mechanisms were used to protect unauthorized access.                                                                                                                                                 | Methods page 5   |
|                        | 10a                                                                                             | Describe statistical methods and analytical approach. Report the statistical software that was used for data analysis.                                                                                                                                                                | Methods page 6   |
| Statistical analysis   | 10b                                                                                             | Report any modification of variables used in the analysis, along with reference (if available).                                                                                                                                                                                       |                  |
|                        | 10c                                                                                             | Report details about how missing data was handled. Include rate of missing items, missing data mechanism (i.e., missing completely at random [MCAR], missing at random [MAR] or missing not at random [MNAR]) and methods used to deal with missing data (e.g., multiple imputation). | Methods page 6   |
|                        | 10d                                                                                             | State how non-response error was addressed.                                                                                                                                                                                                                                           | Methods page 6   |
|                        | 10e                                                                                             | For longitudinal surveys, state how loss to follow-up was addressed.                                                                                                                                                                                                                  | N/A              |
|                        | 10f                                                                                             | Indicate whether any methods such as weighting of items or propensity scores have been used to adjust for non-representativeness of the sample.                                                                                                                                       | N/A              |
|                        | 10g                                                                                             | Describe any sensitivity analysis conducted.                                                                                                                                                                                                                                          | N/A              |

---

## Results

|                            |     |                                                                                                       |     |
|----------------------------|-----|-------------------------------------------------------------------------------------------------------|-----|
| Respondent characteristics | 11a | Report numbers of individuals at each stage of the study. Consider using a flow diagram, if possible. | N/A |
|----------------------------|-----|-------------------------------------------------------------------------------------------------------|-----|

|                        |     |                                                                                                                                                                                                                                 |                       |
|------------------------|-----|---------------------------------------------------------------------------------------------------------------------------------------------------------------------------------------------------------------------------------|-----------------------|
| Descriptive results    | 11b | Provide reasons for non-participation at each stage, if possible.                                                                                                                                                               | N/A                   |
|                        | 11c | Report response rate, present the definition of response rate or the formula used to calculate response rate.                                                                                                                   | Results page 7        |
|                        | 11d | Provide information to define how unique visitors are determined. Report number of unique visitors along with relevant proportions (e.g., view proportion, participation proportion, completion proportion).                    | N/A                   |
|                        | 12  | Provide characteristics of study participants, as well as information on potential confounders and assessed outcomes.                                                                                                           | Results page 7        |
| Main findings          | 13a | Give unadjusted estimates and, if applicable, confounder-adjusted estimates along with 95% confidence intervals and p-values.                                                                                                   | N/A                   |
|                        | 13b | For multivariable analysis, provide information on the model building process, model fit statistics, and model assumptions (as appropriate).                                                                                    | N/A                   |
|                        | 13c | Provide details about any sensitivity analysis performed. If there are considerable amount of missing data, report sensitivity analyses comparing the results of complete cases with that of the imputed dataset (if possible). | N/A                   |
| <b>Discussion</b>      |     |                                                                                                                                                                                                                                 |                       |
| Limitations            | 14  | Discuss the limitations of the study, considering sources of potential biases and imprecisions, such as non-representativeness of sample, study design, important uncontrolled confounders.                                     | Conclusion page 17    |
| Interpretations        | 15  | Give a cautious overall interpretation of results, based on potential biases and imprecisions and suggest areas for future research.                                                                                            | Discussion page 14-17 |
| Generalizability       | 16  | Discuss the external validity of the results.                                                                                                                                                                                   | Discussion page 14-17 |
| <b>Other sections</b>  |     |                                                                                                                                                                                                                                 |                       |
| Role of funding source | 17  | State whether any funding organization has had any roles in the survey's design, implementation, and analysis.                                                                                                                  | Additional page 17-18 |
| Conflict of interest   | 18  | Declare any potential conflict of interest.                                                                                                                                                                                     | Additional page 17-18 |
| Acknowledgements       | 19  | Provide names of organizations/persons that are acknowledged along with their contribution to the research.                                                                                                                     | Additional page 17-18 |
